# Supplementary material
Source: PubMed Central journal article supplement (PMC8932102)
Supplement: NIHMS1762643-supplement-Appendix.pdf [file NIHMS1762643-supplement-Appendix.pdf]

**Supplemental Table 1** Descriptive characteristics of the age-eligible samples in the baseline 2010-11 wave by analytic, missing blood pressure (BP) and covariates and missing vital status samples, South African National Income Dynamics Study (N = 8,338).

| Characteristics                         | Analytic<br>4,993 (60%) | Missing BP &<br>Covariate Data<br>2,418 (30%) | Missing Vital<br>Status<br>927 (11%) |
|-----------------------------------------|-------------------------|-----------------------------------------------|--------------------------------------|
|                                         | No. or mean (% or SD)   |                                               |                                      |
| Age (years)                             | 50.5 (14.0)             | 51.00 (15.15)                                 | 47.9 (13.2)                          |
| Women                                   | 3,432 (68.7)            | 1321 (54.6)                                   | 493 (53.2)                           |
| <b>Race</b>                             |                         |                                               |                                      |
| <i>African</i>                          | 4,226 (84.6)            | 1,699 (70.3)                                  | 544 (58.7)                           |
| <i>Coloured</i>                         | 628 (12.6)              | 509 (21.1)                                    | 164 (17.7)                           |
| <i>Asian/Indian</i>                     | 52 (1.0)                | 38 (1.6)                                      | 35 (3.8)                             |
| <i>White</i>                            | 87 (1.7)                | 172 (7.1)                                     | 184 (19.8)                           |
| <b>Marital status</b>                   |                         |                                               |                                      |
| <i>Married or living with a partner</i> | 2,530 (50.7)            | 1,054 (50.3)                                  | 509 (58.2)                           |
| <i>Widow, divorced, or separated</i>    | 980 (19.6)              | 389 (18.6)                                    | 124 (14.2)                           |
| <i>Never married</i>                    | 1,483 (29.7)            | 653 (31.2)                                    | 241 (27.6)                           |
| <b>Completed schooling</b>              |                         |                                               |                                      |
| <i>No schooling</i>                     | 1,162 (23.3)            | 527 (21.8)                                    | 125 (13.5)                           |
| <i>Primary and secondary</i>            | 3,399 (68.1)            | 1,595 (66.0)                                  | 546 (59.1)                           |
| <i>Tertiary</i>                         | 432 (8.7)               | 294 (12.2)                                    | 253 (27.4)                           |
| <b>Geography type</b>                   |                         |                                               |                                      |
| <i>Urban</i>                            | 2,191 (43.9)            | 1,279 (53.6)                                  | 603 (66.0)                           |
| <i>Traditional</i>                      | 2,394 (47.9)            | 883 (37.0)                                    | 210 (23.0)                           |
| <i>Farms</i>                            | 408 (8.2)               | 223 (9.4)                                     | 101 (11.1)                           |
| <b>Province</b>                         |                         |                                               |                                      |
| <i>Western Cape</i>                     | 395 (7.9)               | 507 (21.0)                                    | 200 (21.8)                           |
| <i>Eastern Cape</i>                     | 686 (13.7)              | 264 (10.9)                                    | 63 (6.9)                             |
| <i>Northern Cape</i>                    | 396 (7.9)               | 260 (10.8)                                    | 77 (8.4)                             |

|                                           |              |              |            |
|-------------------------------------------|--------------|--------------|------------|
| <i>Free State</i>                         | 294 (5.9)    | 149 (6.2)    | 52 (5.7)   |
| <i>KwaZulu-Natal</i>                      | 1,492 (29.9) | 589 (24.4)   | 191 (20.8) |
| <i>North West</i>                         | 351 (7.0)    | 168 (7.0)    | 60 (6.5)   |
| <i>Gauteng</i>                            | 497 (10.0)   | 178 (7.4)    | 145 (15.8) |
| <i>Mpumalanga</i>                         | 396 (7.9)    | 115 (4.8)    | 88 (9.6)   |
| <i>Limpopo</i>                            | 486 (9.7)    | 184 (7.6)    | 43 (4.7)   |
| Self-reported health status               |              |              |            |
| <i>Excellent</i>                          | 1,351 (27.1) | 531 (25.2)   | 297 (34.3) |
| <i>Very good</i>                          | 1,390 (27.8) | 528 (25.1)   | 253 (29.2) |
| <i>Good</i>                               | 1,261 (25.3) | 560 (26.6)   | 209 (24.1) |
| <i>Fair</i>                               | 679 (13.6)   | 320 (15.2)   | 79 (9.1)   |
| <i>Poor</i>                               | 312 (6.2)    | 167 (7.9)    | 29 (3.3)   |
| Current smoker                            | 807 (16.2)   | 408 (22.2)   | 179 (22.2) |
| Number of days of alcohol use per week    |              |              |            |
| < 1                                       | 4,664 (93.4) | 1,640 (89.4) | 728 (90.1) |
| 1-2                                       | 204 (4.1)    | 111 (6.1)    | 51 (6.3)   |
| ≥ 3                                       | 125 (2.5)    | 83 (4.5)     | 29 (3.6)   |
| Reported frequency of exercising per week |              |              |            |
| < 1                                       | 4,446 (89.0) | 1573 (86.5)  | 619 (77.2) |
| 1-2                                       | 332 (6.6)    | 144 (7.9)    | 115 (14.3) |
| ≥ 3                                       | 215 (4.3)    | 102 (5.6)    | 68 (8.5)   |
| Body mass index (kg/m <sup>2</sup> )      | 28.4 (7.6)   | 28.9 (8.5)   | 28.5 (7.6) |

---

**Supplemental Table 2** Age and six-year mortality distribution, South African National Income Dynamics Study (N = 4,993).

| Age          | Population<br>N (%) | 6-year mortality<br>N (%) |
|--------------|---------------------|---------------------------|
| 30-34        | 656 (13.1)          | 53 (6.9)                  |
| 35-39        | 677 (13.6)          | 53 (6.9)                  |
| 40-44        | 645 (12.9)          | 52 (6.8)                  |
| 45-49        | 629 (12.6)          | 59 (7.7)                  |
| 50-54        | 566 (11.3)          | 76 (9.9)                  |
| 55-59        | 518 (10.4)          | 86 (11.2)                 |
| 60-64        | 416 (8.3)           | 79 (10.3)                 |
| 65-69        | 293 (5.9)           | 72 (9.4)                  |
| 70-74        | 275 (5.5)           | 90 (11.7)                 |
| 75-79        | 165 (3.3)           | 70 (9.1)                  |
| ≥ 80         | 153 (3.1)           | 78 (10.2)                 |
| <b>Total</b> | <b>4,993 (100)</b>  | <b>768 (100)</b>          |

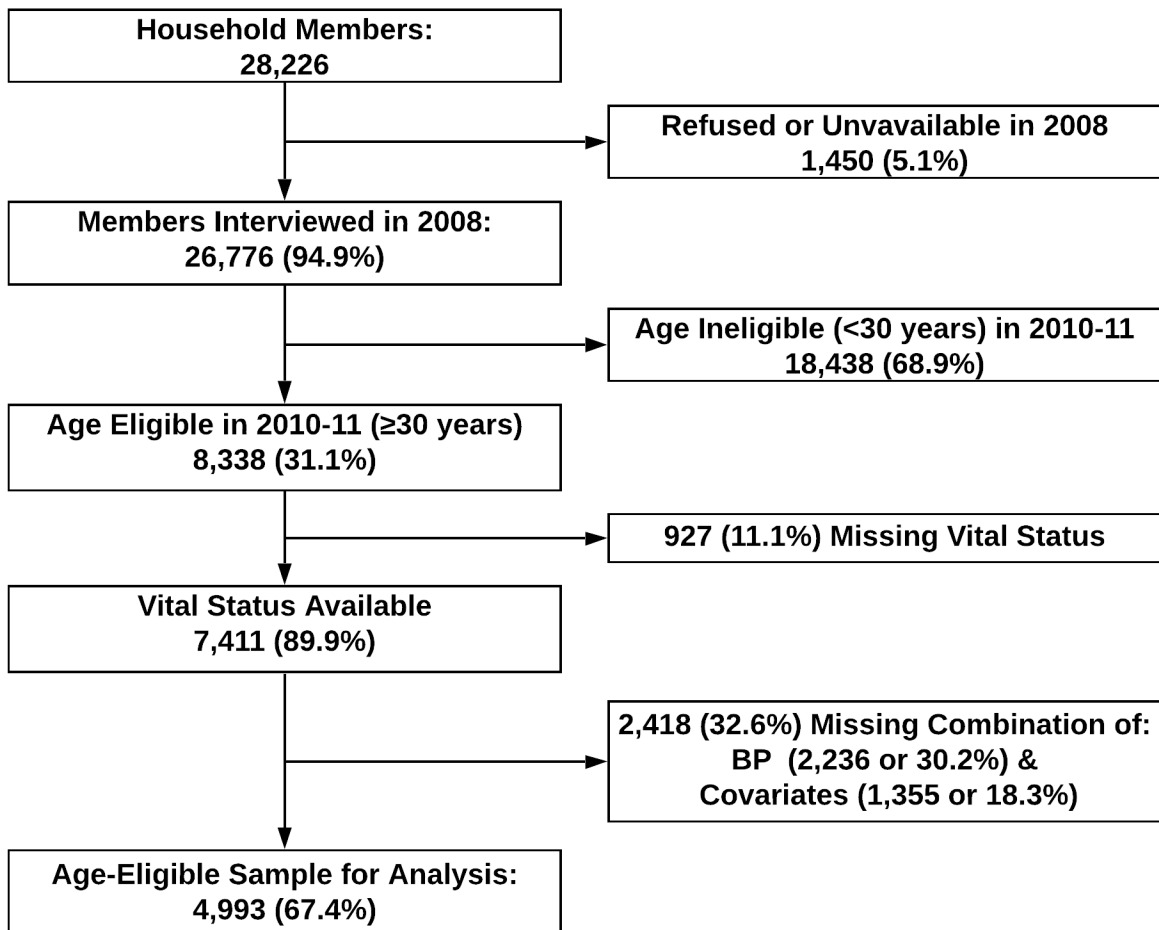

**Supplemental Figure 1** Flowchart for sample selection.

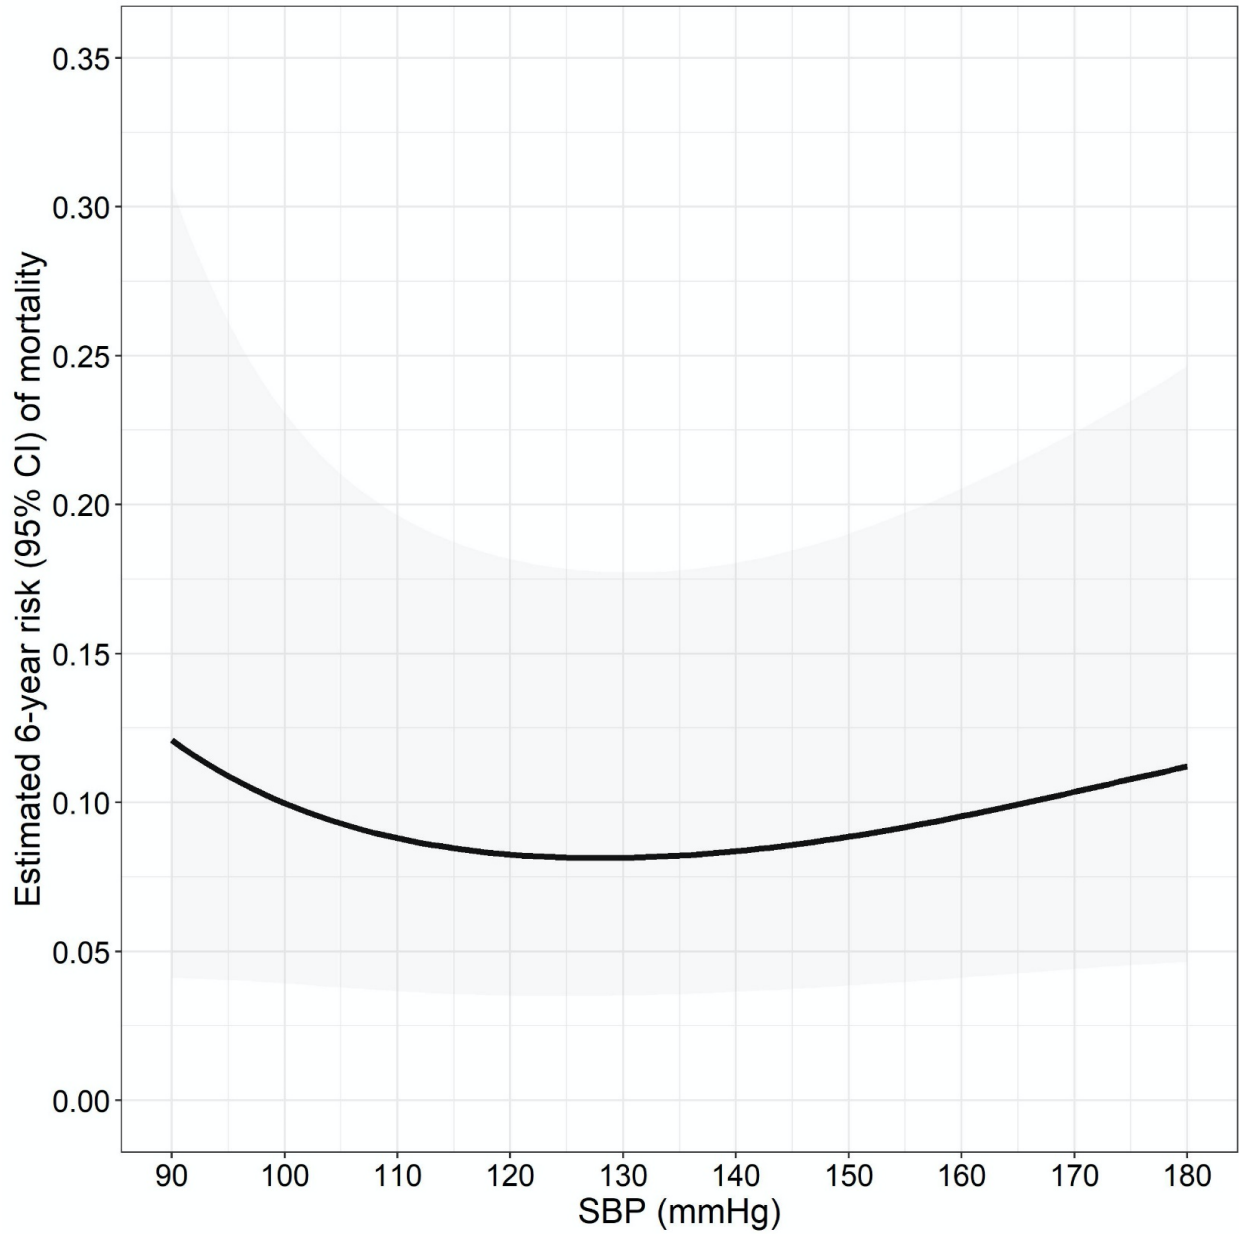

**Supplemental Figure 2** Adjusted relationship between systolic blood pressure (SBP) and six-year mortality risk.

<sup>a</sup>The results are adjusted for age, sex, race, marital status, formal school, geography type, province, self-reported health status, current smoking, exercise, alcohol use, and weight (BMI), and are weighted by the NIDS design weights to adjust for the survey sampling procedures and household non-responses in the baseline survey wave.

**Model** — Adjusted for BP lowering Medicine Use: No — Adjusted for BP Lowering Medicine Use: Yes

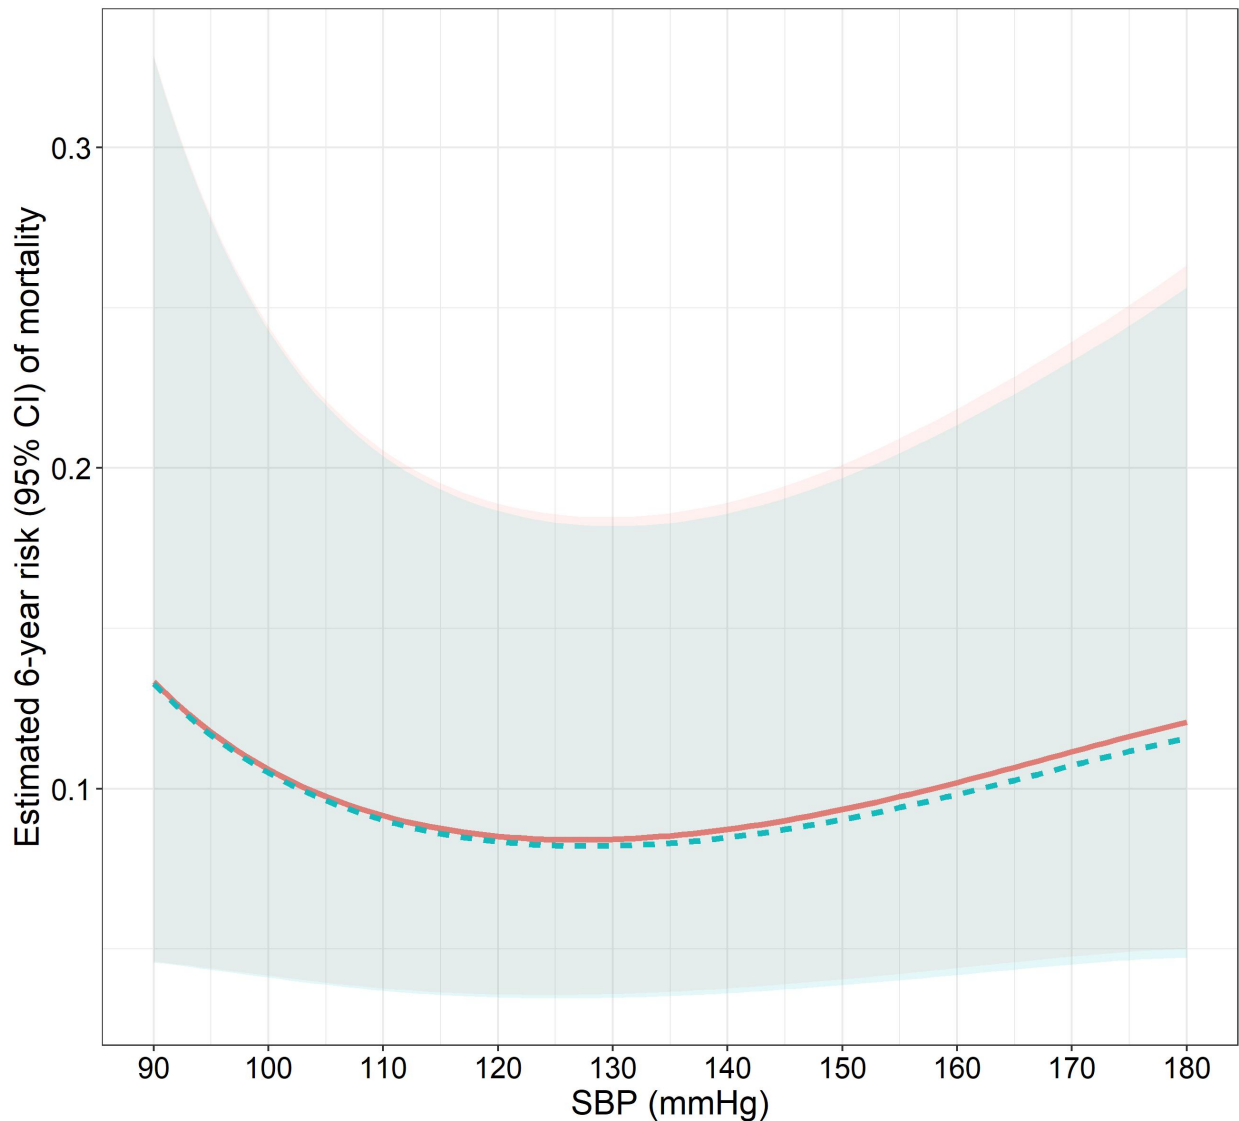

**Supplemental Figure 3** Adjusted relationship between systolic blood pressure (SBP) and six-year mortality risk.

<sup>a</sup>The results depicted in the red line (main results) are adjusted for age, sex, race, marital status, formal school, geography type, province, self-reported health status, current smoking, exercise, alcohol use, and weight (BMI) while those depicted in the green dotted line included the same variable in addition to the self-reported blood pressure (BP) lowering medicine. We weighted the analysis by the NIDS design weights to adjust for the survey sampling procedures and household non-responses in the baseline survey wave.

<sup>b</sup>Among the 4,993 participants in the analytical sample, 965 (19.3%) self-reported as using BP-lowering medicine.

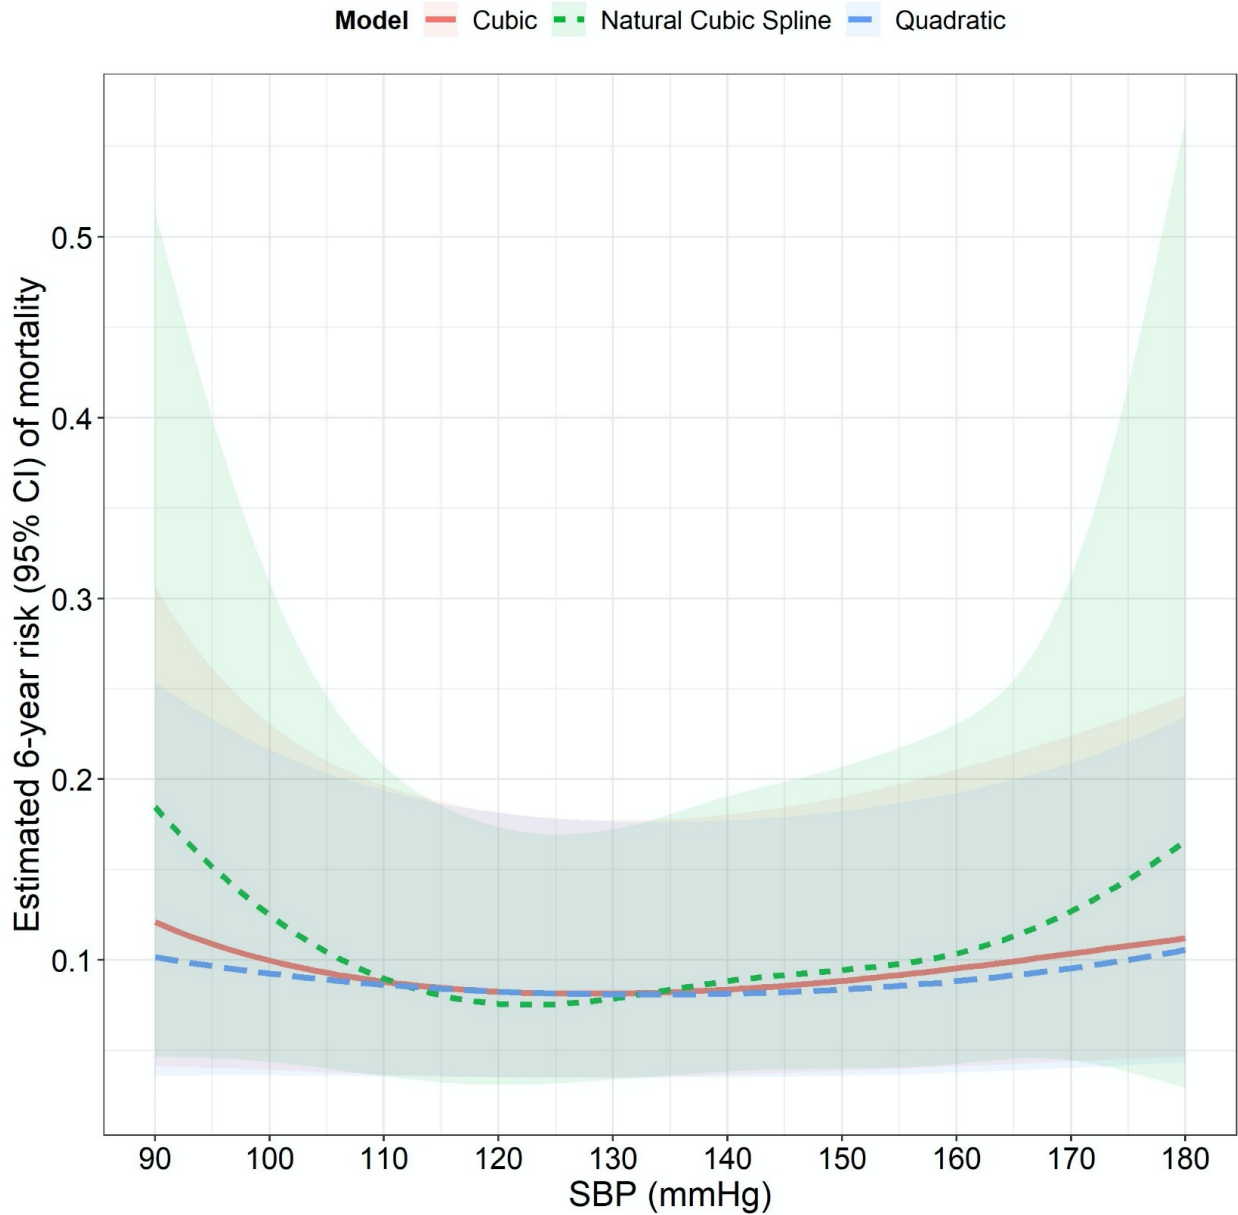

**Supplemental Figure 4** Adjusted relationship between systolic blood pressure (SBP) and six-year mortality risk, modeling SBP as a cubic and quadratic function and natural cubic splines.

<sup>a</sup>The results are adjusted for age, sex, race, marital status, formal school, geography type, province, self-reported health status, current smoking, exercise, alcohol use, and weight (BMI), and are weighted by the NIDS design weights to adjust for the survey sampling procedures and household non-responses in the baseline survey wave.

<sup>b</sup>SBP modeled as a quadratic function, cubic function, and natural cubic spline with knots at 120, 140, and 160 mmHg. The Akaike Information Criterion (AIC) were similar across models (quadratic model: AIC = 3,268; cubic model: AIC = 3,268; natural cubic spline: AIC = 3,268). We selected the cubic model as our main model.

**Supplemental Table 3** Estimated proportion of the population in need of care and mean systolic blood pressure (SBP) reductions for different SBP reduction scenarios by sex, race, and residence type.

|                     | <b>Share in Need of Care</b> |                     |                   |                   |
|---------------------|------------------------------|---------------------|-------------------|-------------------|
|                     | 120 (mmHg)                   | 130 (mmHg)          | 140 (mmHg)        | 150 (mmHg)        |
| Overall             | 65.4 (64.1, 66.7)            | 43.4 (42.0, 44.7)   | 26.6 (25.4, 27.8) | 16.3 (15.3, 17.3) |
| Sex                 |                              |                     |                   |                   |
| <i>Men</i>          | 70.9 (68.6, 73.3)            | 43.4 (40.9, 45.8)   | 24.3 (22.2, 26.3) | 15.4 (13.6, 17.2) |
| <i>Women</i>        | 62.8 (61.3, 64.4)            | 43.4 (41.8, 45.0)   | 27.7 (26.2, 29.2) | 16.7 (15.5, 18.0) |
| Race                |                              |                     |                   |                   |
| <i>African</i>      | 65.4 (64.0, 66.9)            | 42.9 (41.5, 44.4)   | 26.6 (25.3, 27.9) | 16.2 (15.1, 17.3) |
| <i>Coloured</i>     | 72.0 (67.7, 76.3)            | 50.1 (45.1, 55.0)   | 31.3 (26.7, 35.9) | 20.6 (16.4, 24.8) |
| <i>Asian/Indian</i> | 50.4 (38.6, 62.1)            | 35.8 (25.0, 46.6)   | 24.3 (14.3, 34.2) | 12.2 (4.5, 20.0)  |
| <i>White</i>        | 56.5 (49.6, 63.4)            | 43.6 (36.6, 50.6)   | 18.7 (13.2, 24.1) | 11.6 (7.2, 16.0)  |
| Geography type      |                              |                     |                   |                   |
| <i>Urban</i>        | 63.7 (61.9, 65.4)            | 41.9 (40.1, 43.7)   | 25.4 (23.7, 27.1) | 16.4 (15.0, 17.7) |
| <i>Traditional</i>  | 67.0 (65.0, 69.1)            | 45.6 (43.5, 47.7)   | 28.3 (26.5, 30.2) | 16.6 (15.0, 18.2) |
| <i>Farms</i>        | 70.1 (64.7, 75.5)            | 42.4 (36.7, 48.0)   | 25.8 (20.4, 31.2) | 13.5 (9.4, 17.5)  |
|                     | <b>Mean SBP Reductions</b>   |                     |                   |                   |
|                     | 120 (mmHg)                   | 130 (mmHg)          | 140 (mmHg)        | 150 (mmHg)        |
| Overall             | -13.8 (-14.3, -13.3)         | -8.3 (-8.7, -7.9)   | -4.8 (-5.1, -4.5) | -2.7 (-3.0, -2.5) |
| Sex                 |                              |                     |                   |                   |
| <i>Men</i>          | -13.6 (-14.4, -12.8)         | -7.9 (-8.5, -7.2)   | -4.5 (-5.0, -3.9) | -2.5 (-2.9, -2.1) |
| <i>Women</i>        | -13.9 (-14.5, -13.2)         | -8.6 (-9.1, -8.1)   | -5.0 (-5.4, -4.6) | -2.8 (-3.1, -2.5) |
| Race                |                              |                     |                   |                   |
| <i>African</i>      | -13.7 (-14.3, -13.2)         | -8.3 (-8.8, -7.9)   | -4.9 (-5.2, -4.5) | -2.7 (-3.0, -2.5) |
| <i>Coloured</i>     | -16.6 (-18.4, -14.7)         | -10.3 (-11.9, -8.7) | -6.1 (-7.4, -4.8) | -3.6 (-4.6, -2.6) |
| <i>Asian/Indian</i> | -10.1 (-13.3, -7.0)          | -5.8 (-8.1, -3.5)   | -2.9 (-4.4, -1.5) | -1.0 (-1.7, -0.3) |
| <i>White</i>        | -10.8 (-12.8, -8.8)          | -5.9 (-7.4, -4.4)   | -2.9 (-4.0, -1.8) | -1.4 (-2.1, -0.7) |
| Geography type      |                              |                     |                   |                   |
| <i>Urban</i>        | -13.6 (-14.2, -12.9)         | -8.3 (-8.8, -7.7)   | -4.9 (-5.4, -4.5) | -2.9 (-3.2, -2.6) |
| <i>Traditional</i>  | -14.1 (-14.8, -13.4)         | -8.5 (-9.1, -7.9)   | -4.8 (-5.2, -4.4) | -2.6 (-2.9, -2.3) |
| <i>Farms</i>        | -13.3 (-15.2, -11.5)         | -7.6 (-9.2, -6.0)   | -4.1 (-5.4, -2.9) | -2.1 (-3.0, -1.3) |

<sup>a</sup>We weighted the results by the NIDS design weights to adjust for the survey sampling

procedures and household non-responses in the baseline survey wave.

<sup>b</sup>All p-values corresponding to estimates in this table were < 0.0001.



**Supplemental Table 4** Number needed to treat in the analytic sample and among adults aged  $\geq 50$  years old.

| Scenarios | Analytic Sample<br>(N=4,993) | Ages 30-49<br>(N=2607) | Ages 50+<br>(N=2,386) |
|-----------|------------------------------|------------------------|-----------------------|
| 120-mmHg  | 113                          | 115                    | 117                   |
| 130-mmHg  | 56                           | 84                     | 70                    |
| 140-mmHg  | 47                           | 54                     | 54                    |
| 150-mmHg  | 50                           | 40                     | 50                    |

<sup>a</sup>We weighted the results by the NIDS design weights to adjust for the survey sampling procedures and household non-responses in the baseline survey wave.

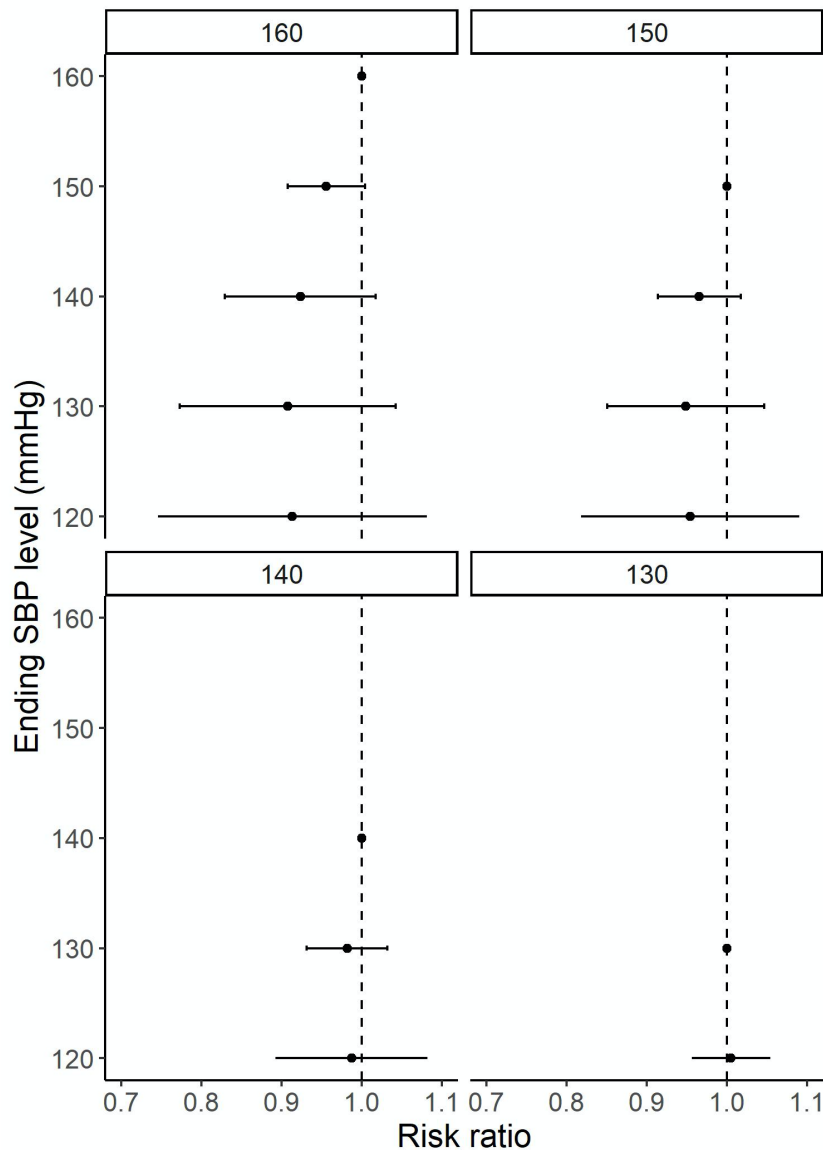

**Supplemental Figure 5** Average six-year mortality risk reductions associated with reducing SBP from specific starting (160, 150, 140, and 130 mmHg) to ending (150, 140, 130, and 120 mmHg) levels with multiple imputation for missing data.

<sup>a</sup>Error bars are 95% confidence intervals.

<sup>b</sup>The results are adjusted for age, sex, race, marital status, formal school, geography type, province, self-reported health status, current smoking, exercise, alcohol use, and weight (BMI), and are weighted by the NIDS design weights to adjust for the survey sampling procedures and household non-responses in the baseline survey wave.

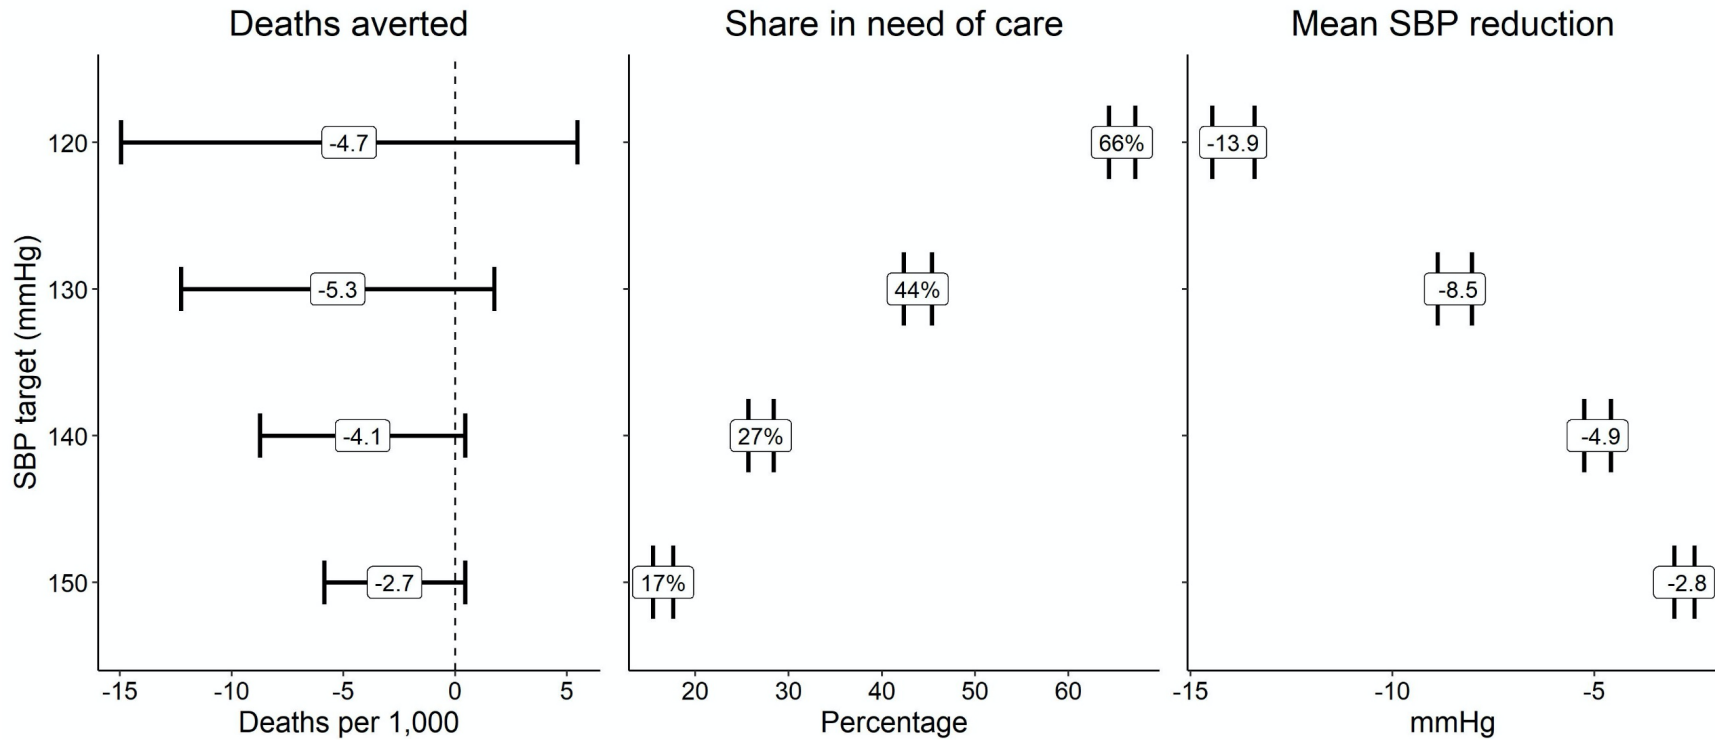

**Supplemental Figure 6** Estimated mortality averted per 1,000, population coverage, and mean SBP reduction for different systolic blood pressure (SBP) reduction scenarios will multiple imputation for missing data.

<sup>a</sup>Error bars represent 95% confidence intervals.

<sup>b</sup>The results are adjusted for age, sex, race, marital status, formal school, geography type, province, self-reported health status, current smoking, exercise, alcohol use, and weight (BMI), and are weighted by the NIDS design weights to adjust for the survey sampling procedures and household non-responses in the baseline survey wave.
